# Supplementary material for: Distinct mechanism of Tb3+ and Eu3+ binding to NCS1
Source: Royal Society of Chemistry journal article supplement (doi:10.1039/d2cp05765d), 2023-01-01
Supplement: d2cp05765d1.pdf [file d2cp05765d1.pdf]

| Supplementary data |                                                                                                                                                                                                                                                                                                                                                                                                                                     |          |
|--------------------|-------------------------------------------------------------------------------------------------------------------------------------------------------------------------------------------------------------------------------------------------------------------------------------------------------------------------------------------------------------------------------------------------------------------------------------|----------|
| Table S1           | Fluorescence decay parameters for NCS1 and 1,8-ANS: NCS1 complex in the presence/absence of metal ions.                                                                                                                                                                                                                                                                                                                             | Page# 2  |
| Table S1           | CCS values determined for Tb <sup>3+</sup> and Eu <sup>3+</sup> ion adducts at 9+ charge state using TIMS-MS.                                                                                                                                                                                                                                                                                                                       | Page# 3  |
| Figure S1          | Determination of the stoichiometry of Tb <sup>3+</sup> /Eu <sup>3+</sup> bound NCS1.                                                                                                                                                                                                                                                                                                                                                | Page# 4  |
| Figure S2          | Far-UV circular dichroism spectra of NCS1 in absence and presence of metal ions.                                                                                                                                                                                                                                                                                                                                                    | Page# 5  |
| Figure S3          | Frequency domain intensity decay of apo- and metal bound NCS1.                                                                                                                                                                                                                                                                                                                                                                      | Page# 6  |
| Figure S4          | Titration curves of Tb <sup>3+</sup> /Eu <sup>3+</sup> binding to Ca <sup>2+</sup> NCS1:1,8-ANS.                                                                                                                                                                                                                                                                                                                                    | Page# 7  |
| Figure S5          | Frequency domain intensity decay of apo- and metal bound NCS1:1,8-ANS complex.                                                                                                                                                                                                                                                                                                                                                      | Page# 8  |
| Figure S6          | Luminescence decay of Eu <sup>3+</sup> itself and in presence of NCS1.                                                                                                                                                                                                                                                                                                                                                              | Page# 9  |
| Figure S7          | Steady state anisotropy of isolated D2R peptide and NCS1:D2R complex in the absence or presence of metal ions.                                                                                                                                                                                                                                                                                                                      | Page# 10 |
| Figure S8          | Expanded view of the 9+ charge state with annotated adduct species and the isotopic pattern of the ion [M•2Na•Eu+4H] <sup>9+</sup> shown in the inset (A). Typical broadband nESI-FT-ICR MS spectrum of NCS1 in the presence of Eu <sup>3+</sup> (B). Deconvoluted spectrum showing the neutral species. The isotopic pattern shown in the inset confirms the theoretical isotopic average mass of the NCS1 protein 22.976 kDa (C). | Page# 11 |
| Figure S9          | Comparison of experimental isotopic distributions of NCS1:Tb (red) and NCS1:Eu (blue) adduct species obtained from nESI-FT-ICR MS with their theoretical isotope patterns (black).                                                                                                                                                                                                                                                  | Page# 12 |
| Figure S10         | <sup>TIMS</sup> CCS <sub>N2</sub> profiles for the charge state 9+ of NCS1 in the presence of Tb <sup>3+</sup> (left) and Eu <sup>3+</sup> (right) obtained from nESI-TIMS-TOF MS.                                                                                                                                                                                                                                                  | Page# 13 |

Table S1: Fluorescence decay parameters for NCS1 and 1,8-ANS: NCS1 complex in the presence/absence of metal ions.

| NCS1             | $\tau_1$ (ns) | $f_1$ (%) | $\tau_2$ (ns) | $f_2$ (%) | $\tau_3$ (ns) | $f_3$ (%) | $\langle\tau\rangle$ (ns) | $\chi^2$ |
|------------------|---------------|-----------|---------------|-----------|---------------|-----------|---------------------------|----------|
| Apo              | 0.66          | 9         | 3.20          | 56        | 6.30          | 36        | 4.11                      | 0.9      |
| Ca <sup>2+</sup> | 0.64          | 16        | 2.99          | 53        | 5.65          | 41        | 3.63                      | 1.5      |
| Tb <sup>3+</sup> | 0.29          | 5         | 2.12          | 36        | 4.84          | 59        | 3.60                      | 2.0      |
| Eu <sup>3+</sup> | 0.47          | 8         | 2.45          | 44        | 4.99          | 48        | 3.54                      | 1.5      |
| NCS1:ANS         |               |           |               |           |               |           |                           |          |
| Apo              | 0.28          | 8         | 4.25          | 15        | 16.60         | 77        | 13.50                     | 1.8      |
| Ca <sup>2+</sup> | 0.28          | 7         | 4.47          | 17        | 17.20         | 76        | 14.05                     | 1.5      |
| Tb <sup>3+</sup> | 0.28          | 7         | 5.08          | 14        | 17.45         | 79        | 14.80                     | 1.1      |
| Eu <sup>3+</sup> | 0.28          | 7         | 5.12          | 14        | 17.20         | 79        | 14.25                     | 1.1      |

Table S2: CCS values determined for Tb<sup>3+</sup> and Eu<sup>3+</sup> ion adducts at 9+ charge state using TIMS-MS.

| Tb <sup>3+</sup> ion                                           |                             | Eu <sup>3+</sup> ion                                           |                             |
|----------------------------------------------------------------|-----------------------------|----------------------------------------------------------------|-----------------------------|
| <sup>TIMS</sup> CCS <sub>N<sub>2</sub></sub> (Å <sup>2</sup> ) | Ion specie                  | <sup>TIMS</sup> CCS <sub>N<sub>2</sub></sub> (Å <sup>2</sup> ) | Ion specie                  |
| 2182                                                           | [M-3Ca+3H] <sup>9+</sup>    | 2192                                                           | [M-3Ca+3H] <sup>9+</sup>    |
| 2204                                                           | [M-Tb+6H] <sup>9+</sup>     | 2201                                                           | [M-3Ca-Na+2H] <sup>9+</sup> |
| 2189                                                           | [M-Ca-Tb+4H] <sup>9+</sup>  | 2204                                                           | [M-4Ca+H] <sup>9+</sup>     |
| 2201                                                           | [M-2Ca-Tb+2H] <sup>9+</sup> | 2198                                                           | [M-2Na-Eu+4H] <sup>9+</sup> |
| 2179                                                           | [M-3Ca-Tb] <sup>9+</sup>    | 2179                                                           | [M-2Ca-Eu+2H] <sup>9+</sup> |
| 2195                                                           | [M-2Tb+3H] <sup>9+</sup>    | 2163                                                           | [M-3Ca-Eu] <sup>9+</sup>    |

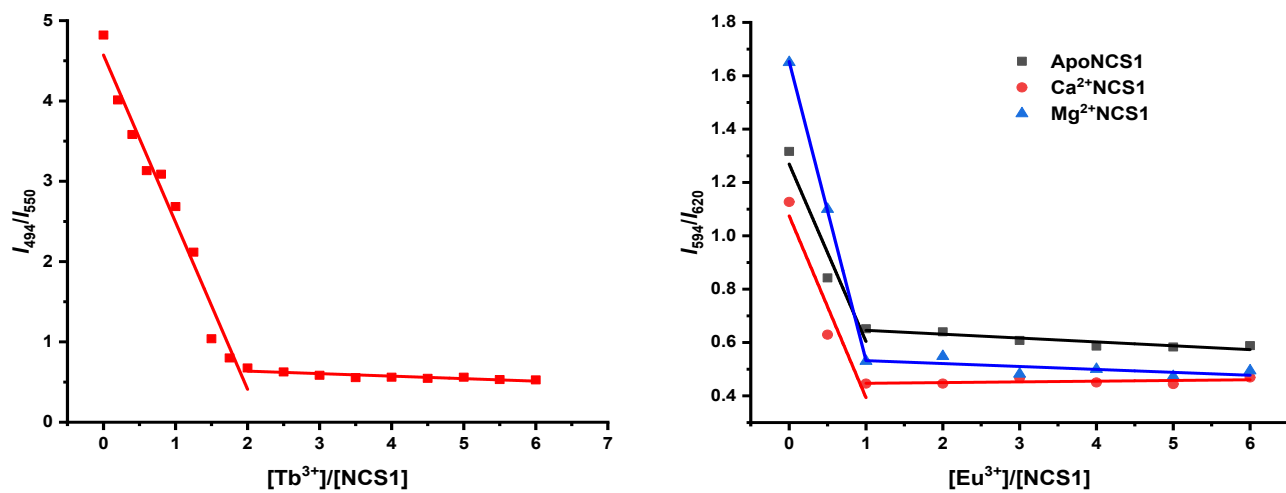

Figure S1: Determination of the stoichiometry of  $Tb^{3+}/Eu^{3+}$  bound NCS1.

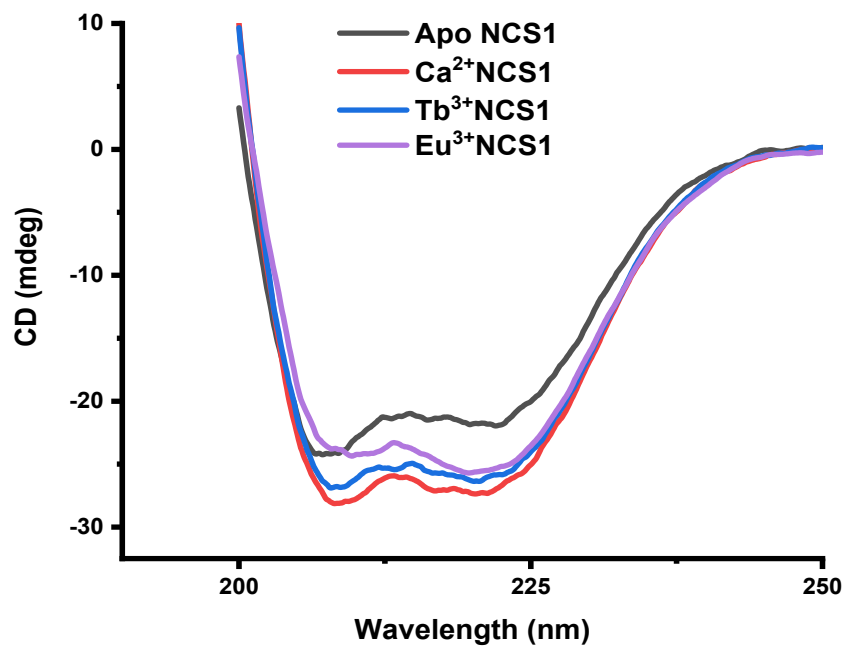

Figure S2: Far-UV circular dichroism spectra of NCS1 in absence and presence of metal ions. Conditions as in the figure 1.

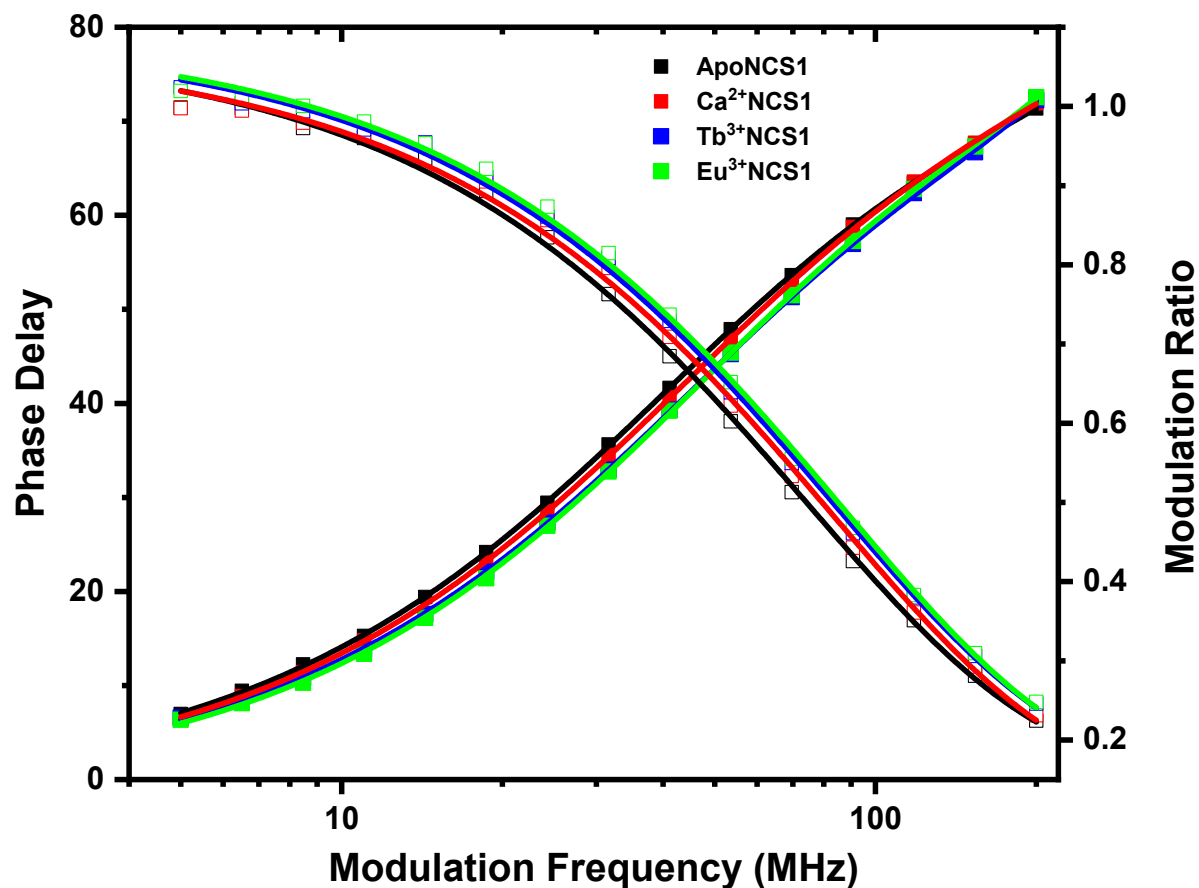

Figure S3: Frequency domain intensity decay of apo- and metal bound NCS1. Solid and open symbols indicate modulation ratio and phase delay data points, respectively. The solid line corresponds to the fit of the experimental data using a sum of three discrete exponential decay model. Conditions: 10  $\mu$ M NCS1, 20 mM Tris buffer, pH 7.40, and 1 mM EDTA or 1 mM Ca<sup>2+</sup>, 40  $\mu$ M Tb<sup>3+</sup>, 40  $\mu$ M Eu<sup>3+</sup>.

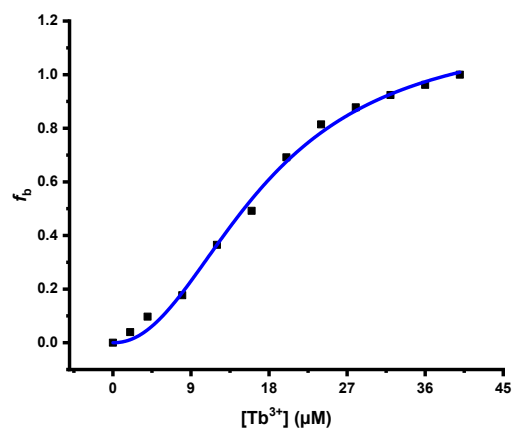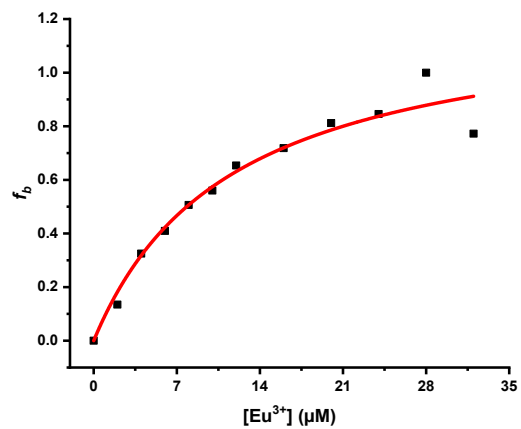

Figure S4: Titration curves of Tb<sup>3+</sup>/Eu<sup>3+</sup> binding to Ca<sup>2+</sup>NCS1:1,8-ANS. Conditions: 10 μM NCS1, 20 μM 1,8-ANS, 1 mM Ca<sup>2+</sup>, 40 μM Tb<sup>3+</sup>, 32 μM Eu<sup>3+</sup> and λ<sub>exc</sub>=350 nm.

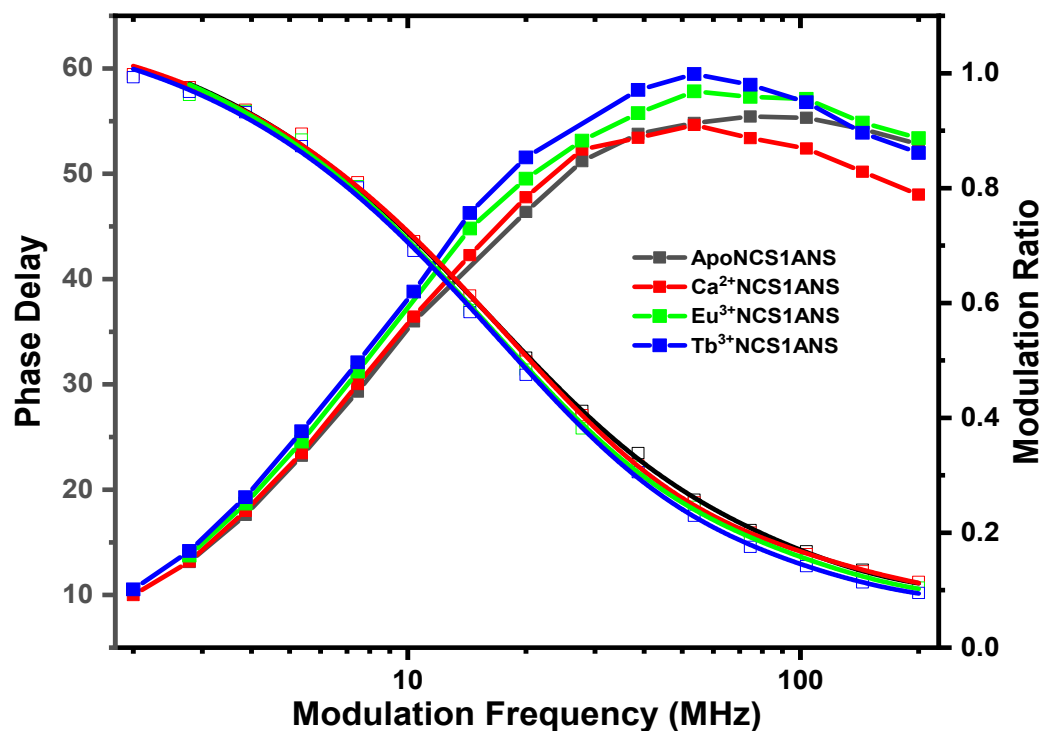

Figure S5: Frequency domain intensity decay of apo- and metal bound NCS1:1,8-ANS complex. Open and solid symbols indicate modulation ratio and phase delay data points, respectively. The solid line corresponds to the fit of the experimental data using a sum of three discrete exponential decay model. Conditions: 10  $\mu\text{M}$  NCS1, 20  $\mu\text{M}$  1,8-ANS, 20 mM Tris buffer, pH 7.40, and 1 mM EDTA or 1 mM  $\text{Ca}^{2+}$ , 40  $\mu\text{M}$   $\text{Tb}^{3+}$ , 40  $\mu\text{M}$   $\text{Eu}^{3+}$ .



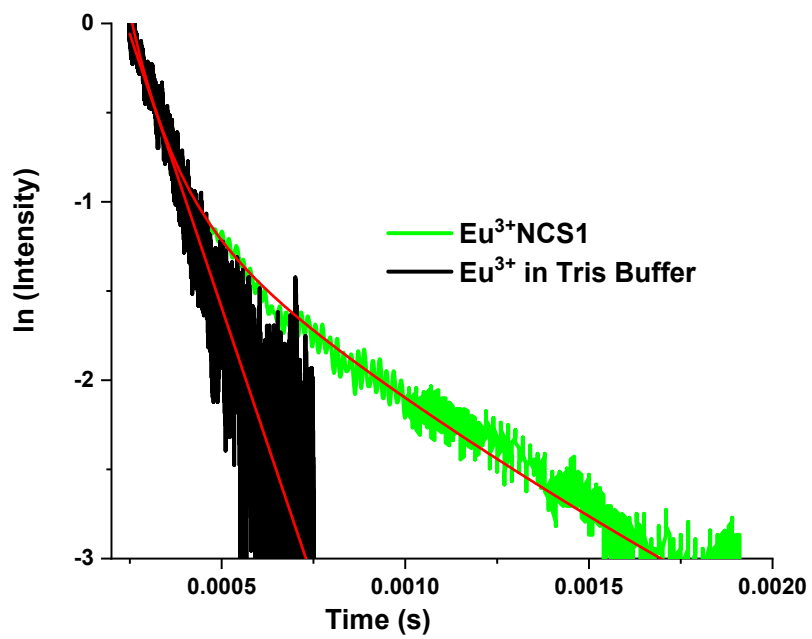

Figure S6: Luminescence decay of  $\text{Eu}^{3+}$  itself and in presence of NCS1. Conditions:  $40 \mu\text{M}$  NCS1 and  $20 \mu\text{M}$   $\text{Eu}^{3+}$ .

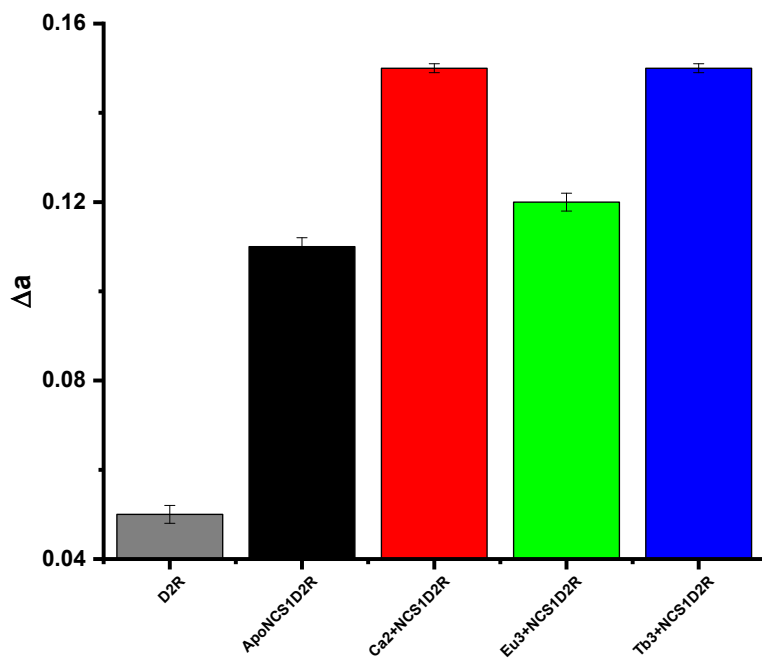

Figure S7: Steady state anisotropy of isolated D2R peptide and NCS1:D2R complex in the absence or presence of metal ions. Conditions: 10  $\mu\text{M}$  NCS1, 500 nM D2R, 1 mM EDTA, 1 mM  $\text{Ca}^{2+}$ , 40  $\mu\text{M}$   $\text{Tb}^{3+}$ , 40  $\mu\text{M}$   $\text{Eu}^{3+}$  and  $\lambda_{\text{exc}}=490$  nm.

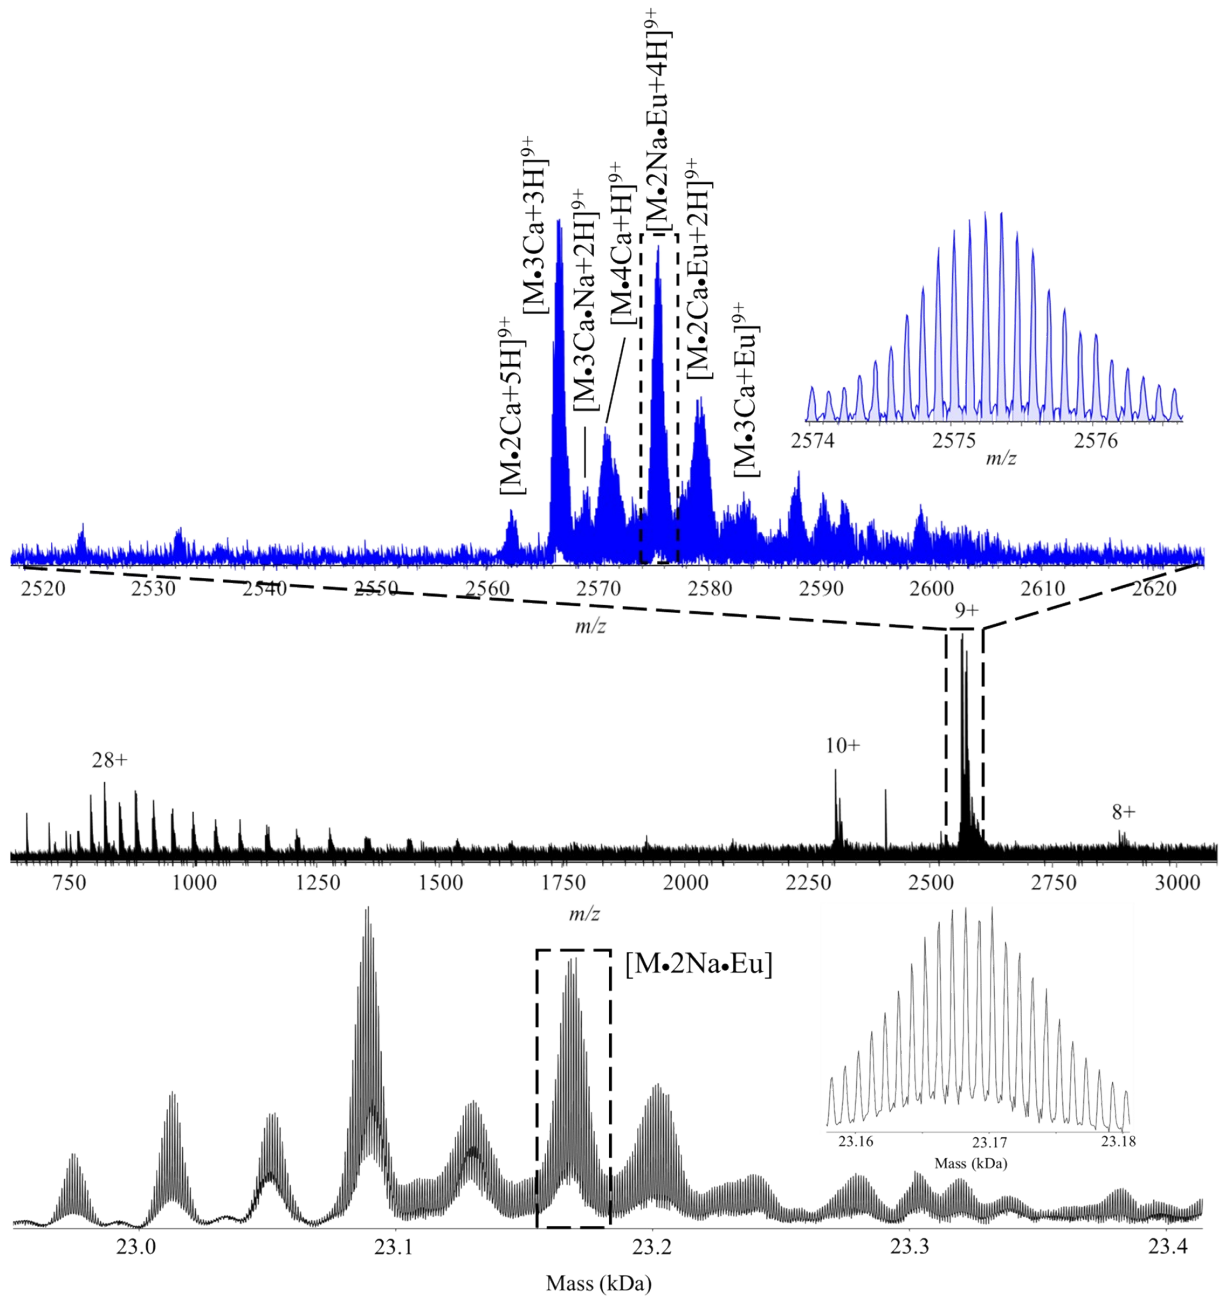

Figure S8: Expanded view of the 9+ charge state with annotated adduct species and the isotopic pattern of the ion  $[M\cdot 2Na\cdot Eu+4H]^{9+}$  shown in the inset (A). Typical broadband nESI-FT-ICR MS spectrum of NCS1 in the presence of  $Eu^{3+}$  (B). Deconvoluted spectrum showing the neutral species. The isotopic pattern shown in the inset confirms the theoretical isotopic average mass of the NCS1 protein 22.976 kDa (C).

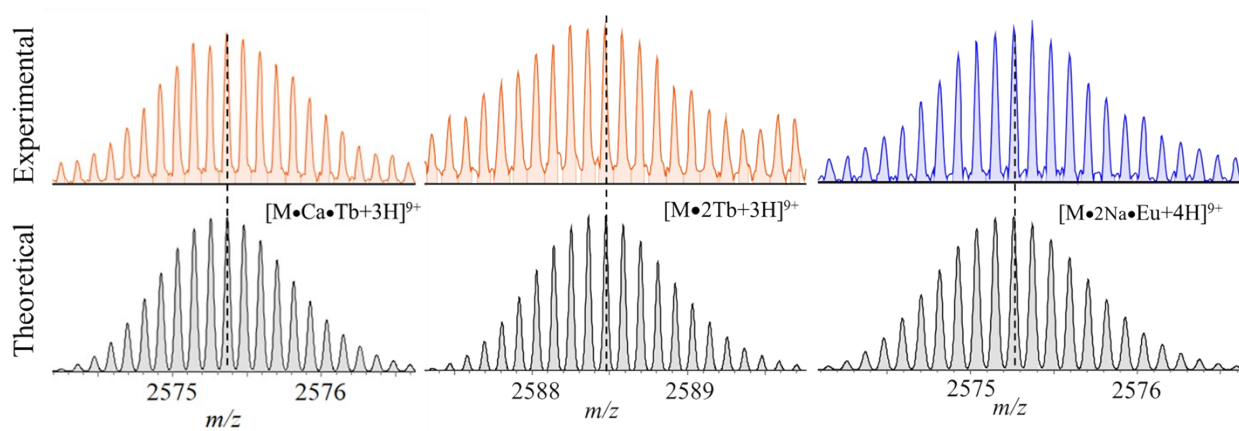

Figure S9: Comparison of experimental isotopic distributions of NCS1:Tb (red) and NCS1:Eu (blue) adduct species obtained from nESI-FT-ICR MS with their theoretical isotope patterns (black). Note the good agreement between profiles indicated by the dashed lines.

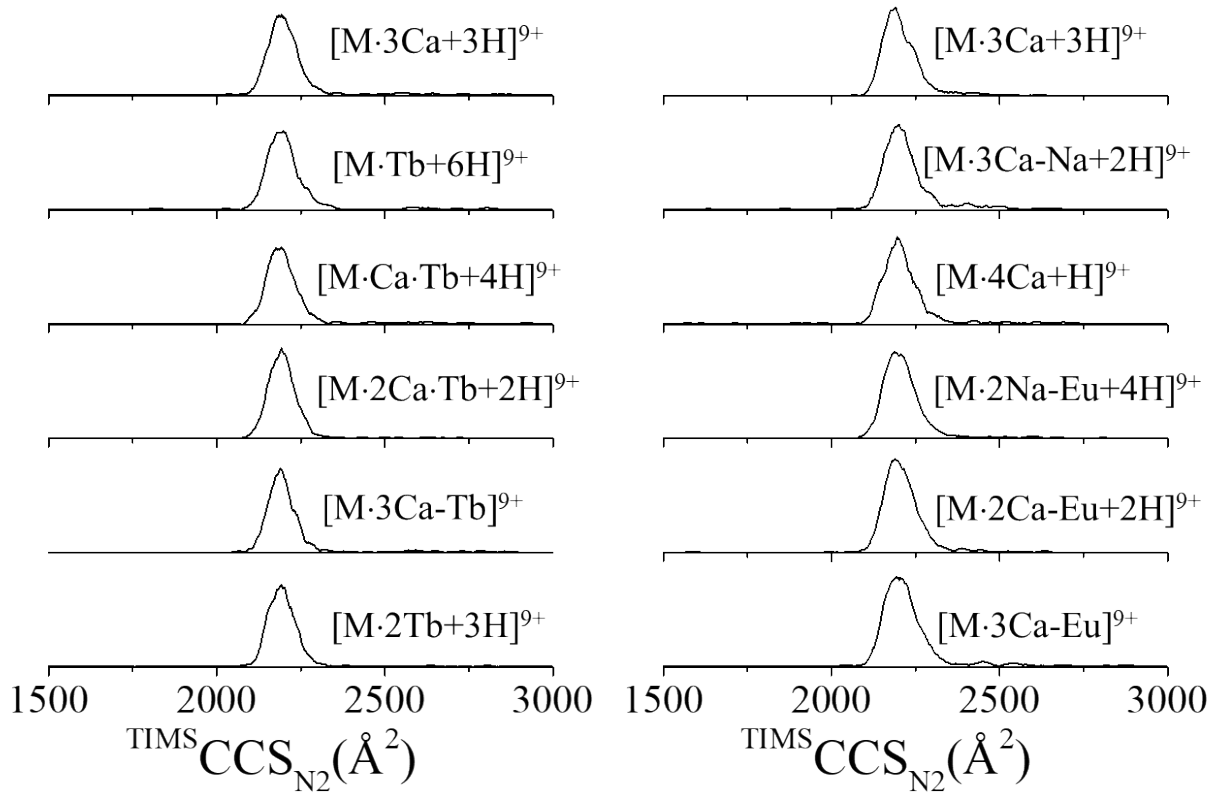

Figure S10:  $\text{TMS} \text{CCS}_{\text{N}_2}$  profiles for the charge state 9+ of NCS1 in the presence of  $\text{Tb}^{3+}$  (left) and  $\text{Eu}^{3+}$  (right) obtained from nESI-TIMS-TOF MS.
